# Supplementary material for: Online and Offline Aggressive Behaviors in Adolescence: The Role of Self-Regulatory Self-Efficacy Beliefs
Source: Preprints.org preprint supplement (doi:10.20944/preprints202407.2514.v1), 2024-07-31
Supplement: Supplementary file 2 [file supplementary]

Original Article

Online and Offline Aggressive Behaviors in Adolescence: The Role of Self-Regulatory Self-Efficacy Beliefs

Ainzara Favini 1, *, Carolina Lunetti 2,, Alessia Teresa Virzì 3, Flavia Culcasi 4, Tiziana Quarto 1, Loreta Cannito 5, and Paola Palladino 1

| **Citation:** To be added by editorial staff during production.  Academic Editor: Firstname Lastname  Received: date  Revised: date  Accepted: date  Published: date  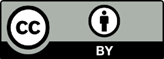  **Copyright:** © 2024 by the authors. Submitted for possible open access publication under the terms and conditions of the Creative Commons Attribution (CC BY) license (https://creativecommons.org/licenses/by/4.0/). |
| --- |

1 Department of Humanities, University of Foggia, Italy; [ainzara.favini@unifg.it](mailto:ainzara.favini@unifg.it)

2 Faculty of Education Sciences, Guglielmo Marconi University, Italy; [c.lunetti@unimarconi.it](mailto:c.lunetti@unimarconi.it)

3 Department of Psychology, Sapienza University of Rome, [alessia.virzi@uniroma1.it](mailto:alessia.virzi@uniroma1.it)

4 Clinic for Substance and Behavioral Addiction, Academic Foundation Policlinic Agostino Gemelli IRCCS, Italy; [flaviaculcasi@gmail.com](mailto:flaviaculcasi@gmail.com)

1 Department of Humanities, University of Foggia, Italy; [tiziana.quarto@unifg.it](mailto:tiziana.quarto@unifg.it)

5 Department of Social Sciences, University of Foggia, Italy; [loreta.cannito@unifg.it](mailto:loreta.cannito@unifg.it)

1 Department of Humanities, University of Foggia, Italy; [paola.palladino@unifg.it](mailto:paola.palladino@unifg.it)

***** Correspondence: A.F.: ainzara.favini@unifg.it

Appendix A

**Table A1.** Descriptive statistics and zero-order correlations of all the study variables.

|  | **(1)** | **(2)** | **(3)** | **(4)** | **(5)** | **(6)** | **(7)** | **(8)** |
| --- | --- | --- | --- | --- | --- | --- | --- | --- |
| Age (1) | - |  |  |  |  |  |  |  |
| Sexual orientation (2) | .00 | - |  |  |  |  |  |  |
| Years of instruction (3) | .31*** | .08 | - |  |  |  |  |  |
| Socioeconomic status (4) | -.13* | -.05 | -.07 | - |  |  |  |  |
| Impulsivity T1 (5) | -.04 | .06 | .10 | -.00 | - |  |  |  |
| Self-Regulatory Self-Efficacy (6) | .04 | .02 | -.02 | -.04 | -.31*** | - |  |  |
| Offline Aggression T2 (7) | -.16** | -.01 | -.19*** | .02 | .20*** | -.32*** | - |  |
| Online Aggression T2 (8) | -.04 | -.06 | -.08 | -.03 | .29*** | -.43*** | -.37*** | - |
|  |  |  |  |  |  |  |  |  |
| Mean | 15.21 | - | - | .00 | 2.27 | 4.09 | .65 | 1.28 |
| *SD* | .51 | - | - | 1.00 | .72 | .82 | .62 | .52 |
| Alpha | - | - | - | - | .77 | .84 | .91 | .80 |
| Omega | - | - | - | - | .71 | .84 | .92 | .81 |

*Notes*: T1 = Wave 1; T2 = Wave 2.

*** = *p* < .001; ** = *p* < .01; * = *p* < .05.
